# Supplementary material
Source: MDPI journal article supplement (https://www.mdpi.com/2073-4433/11/4/358)
Supplement: s1 [file s1]

## Supplementary Materials:

# Modeling of Carbonyl/Ammonium Sulfate Aqueous Brown Carbon Chemistry via UV/Vis Spectral Decomposition

Mengjie Fan <sup>1,2</sup>, Shiqing Ma <sup>1</sup>, Nahin Ferdousi <sup>1</sup>, Ziwei Dai <sup>1,3</sup>, and Joseph L. Woo <sup>1,\*</sup>

<sup>1</sup> Department of Chemical and Biomolecular Engineering, Lafayette College, Easton, PA 18042, USA; fanmj@seas.upenn.edu (M.F.); mas@lafayette.edu (S.M.); ferdousn19@gmail.com (N.F.); zdai2@nd.edu (Z.D.)

<sup>2</sup> Now Located: Department of Chemical and Biomolecular Engineering, University of Pennsylvania, Philadelphia, PA 19104, USA.

<sup>3</sup> Now Located: Department of Chemical and Biomolecular Engineering, University of Notre Dame, Notre Dame, IN 46556, USA.

\* Correspondence: wooj@lafayette.edu; Tel.: +1-610-330-3291

**Table S1.** Normalized Root Mean Square Deviation (NRMSD) values for simulations performed at varying times, numbers of Gaussian lineshapes, and CVOC/AS reaction systems.

| Time (hrs) | G      |        |        | GA     |        |        | MG     |        |        |
|------------|--------|--------|--------|--------|--------|--------|--------|--------|--------|
|            | Double | Triple | Quad   | Double | Triple | Quad   | Double | Triple | Quad   |
| 0          | 0.0189 | 0.0100 | 0.0091 | 0.0436 | 0.0125 | 0.0124 | 0.0267 | 0.0146 | 0.0146 |
| 1          | 0.0206 | 0.0119 | 0.0108 | 0.0427 | 0.0117 | 0.0118 | 0.0152 | 0.0110 | 0.0121 |
| 2          | 0.0211 | 0.0117 | 0.0103 | 0.0405 | 0.0122 | 0.0124 | 0.0122 | 0.0104 | 0.0109 |
| 3          | 0.0219 | 0.0123 | 0.0109 | 0.0432 | 0.0131 | 0.0133 | 0.0121 | 0.0100 | 0.0102 |
| 4          | 0.0229 | 0.0129 | 0.0113 | 0.0436 | 0.0130 | 0.0131 | 0.0126 | 0.0099 | 0.0100 |
| 5          | 0.0238 | 0.0135 | 0.0119 | 0.0430 | 0.0125 | 0.0126 | 0.0130 | 0.0097 | 0.0094 |
| 6          | 0.0237 | 0.0135 | 0.0119 | 0.0406 | 0.0121 | 0.0121 | 0.0139 | 0.0102 | 0.0092 |

**Table S2.** Maximum percentage error in the 205-300nm region for simulations performed at varying times, numbers of Gaussian lineshapes, and CVOC/AS reaction systems.

| Time (hrs) | G      |        |       | GA     |        |       | MG     |        |       |
|------------|--------|--------|-------|--------|--------|-------|--------|--------|-------|
|            | Double | Triple | Quad  | Double | Triple | Quad  | Double | Triple | Quad  |
| 0          | 60.0%  | 55.9%  | 56.4% | 30.0%  | 27.8%  | 27.9% | 41.8%  | 43.8%  | 55.1% |
| 1          | 59.6%  | 72.6%  | 74.7% | 41.9%  | 22.8%  | 22.9% | 28.0%  | 30.0%  | 43.9% |
| 2          | 27.8%  | 39.9%  | 41.6% | 32.6%  | 30.5%  | 30.6% | 19.8%  | 21.6%  | 36.7% |
| 3          | 37.4%  | 35.8%  | 37.7% | 41.1%  | 27.8%  | 27.8% | 15.3%  | 17.1%  | 32.4% |
| 4          | 27.2%  | 35.7%  | 37.2% | 50.7%  | 30.3%  | 30.3% | 11.2%  | 12.3%  | 27.6% |
| 5          | 49.8%  | 59.9%  | 61.7% | 45.6%  | 30.5%  | 30.6% | 11.9%  | 12.0%  | 25.6% |
| 6          | 33.1%  | 42.6%  | 44.1% | 88.8%  | 65.5%  | 65.6% | 14.9%  | 11.7%  | 24.0% |

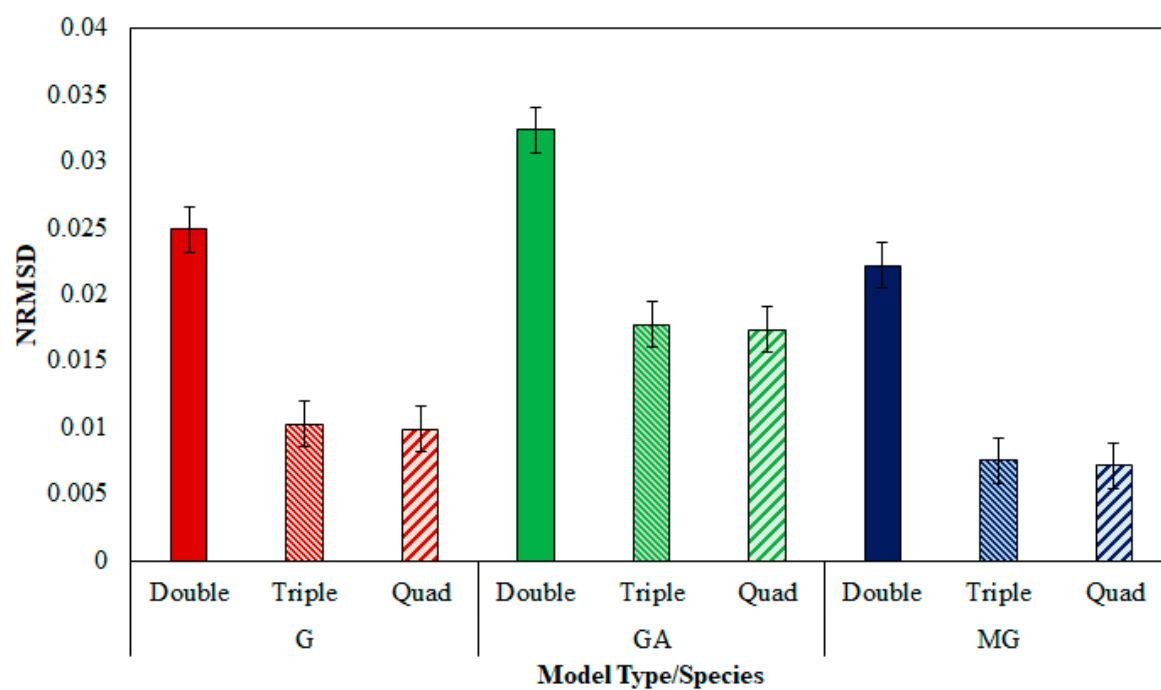

**Figure S1.** Multiple comparison test of population marginal means for the NRMSD of different CVOC/AS reaction systems and number of Gaussian curves used in model regression, across all times (0-6 hours).
